# Supplementary material for: Designing a thiophene-fused benzoxadizole as an acceptor to build a narrow bandgap polymer for all-polymer solar cells
Source: Royal Society of Chemistry journal article supplement (doi:10.1039/c7ra02705b), 2017-01-01

## Supporting Information for

### Designing Thiophene-fused benzoxadizole as an Acceptor to Build a Narrow Bandgap Polymer for All-Polymer Solar Cells

Yang Yang<sup>1</sup>, Jiacheng Wang<sup>1</sup>, Xiaowei Zhan<sup>2\*</sup>, Xingguo Chen<sup>1\*</sup>

<sup>1</sup>Hubei Key Laboratory on Organic and Polymeric Opto-electronic Materials, College of Chemistry and Molecular Sciences, Wuhan University, Wuhan 430072, China.

Email: [xgchen@whu.edu.cn](mailto:xgchen@whu.edu.cn)

<sup>2</sup>Department of Materials Science and Engineering, College of Engineering, Peking University, Beijing 100871, China. Email: [xwzhan@pku.edu.cn](mailto:xwzhan@pku.edu.cn).

#### Device fabrication

All polymer solar cells were fabricated with a structure of ITO/PEDOT:PSS/P3HT:PBXT-IDT/Ca/Al. The patterned indium tin oxide (ITO) glass (sheet resistance =  $10 \Omega \square^{-1}$ ) was pre-cleaned in an ultrasonic bath of deionized water, acetone and isopropanol, followed by oxygen plasma treatment (25 min) in an ultraviolet–ozone chamber (Jelight Company, USA). A thin layer (30 nm) of poly(3,4-ethylenedioxythiophene):poly(styrene sulfonate) (PEDOT:PSS, Baytron PVP Al 4083, Germany) was spin-coated onto the ITO glass at 4000 rpm and baked subsequently at 150 °C for 20 min. The mixture of P3HT:PBXT-IDT in chlorobenzene solvent (14 mg mL<sup>-1</sup> in total) with or without chloroform was spin-coated on a PEDOT:PSS layer to form an active layer. Calcium (ca. 20 nm) and aluminium (ca. 80 nm) layers were deposited onto the active layer in a vacuum at a pressure of ca.  $5.0 \times 10^{-5}$  Pa to form the negative electrode. The active area of the device was 4 mm<sup>2</sup>. The current density–voltage (*J*-*V*) characteristics were measured on a computer–controlled B2912A Precision Source/Measure Unit (Agilent Technologies). A XES-70S1 (SAN-EI Electric Co., Ltd) solar simulator (AAA grade, 70 × 70 mm<sup>2</sup> photobeam size) coupled with AM 1.5 G solar spectrum filters was used as the light

source, and the optical power at the sample was  $100 \text{ mW/cm}^2$ . A  $2 \times 2 \text{ cm}^2$  monocrystalline silicon reference cell (SRC-1000-TC-QZ) was purchased from VLSI Standards Inc. A Solar Cell Spectral Measurement System QE-R3011 (Enlitech Co., Ltd) was used for the EQE spectrum measurement. The light intensity at each wavelength was calibrated using a standard single crystal Si photovoltaic cell. The hole mobility and electron mobility were measured using the structure: ITO/PEDOT:PSS/P3HT:PBXT-IDT/Au and ITO/titanium (diisopropoxide) bis(2,4-pentanedionate) (TIPD)/P3HT:PBXT-IDT/Al respectively. And the mobility was extracted by fitting the current J–V curves using the Mott–Gurney relationship (space charge limited current).

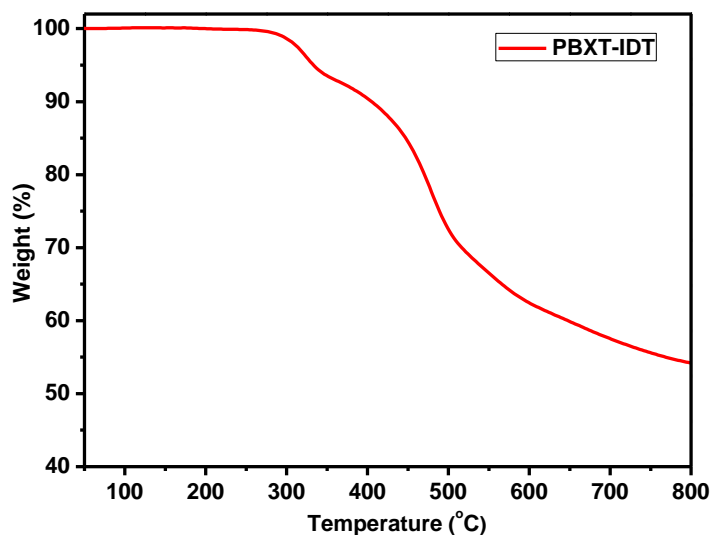

**Figure S1.** The TGA curve of PBXT-IDT

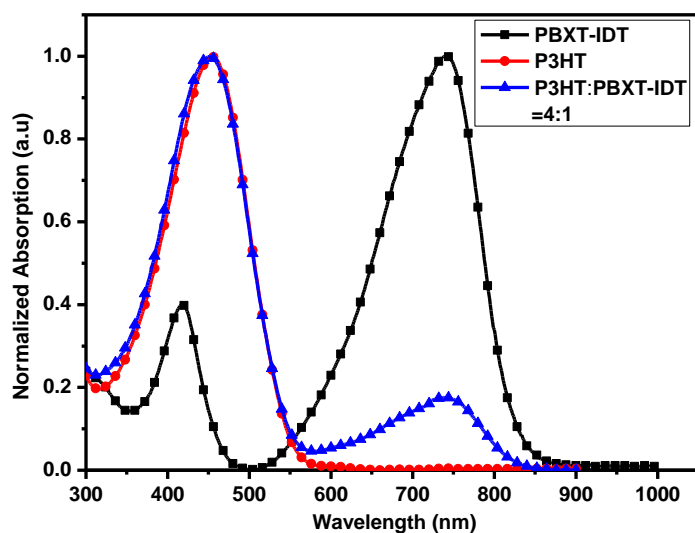

**Figure S2.** Absorption spectra of PBXT-IDT, P3HT and P3HT:PBXT-IDT (4:1,p/n) in chlorobenzene

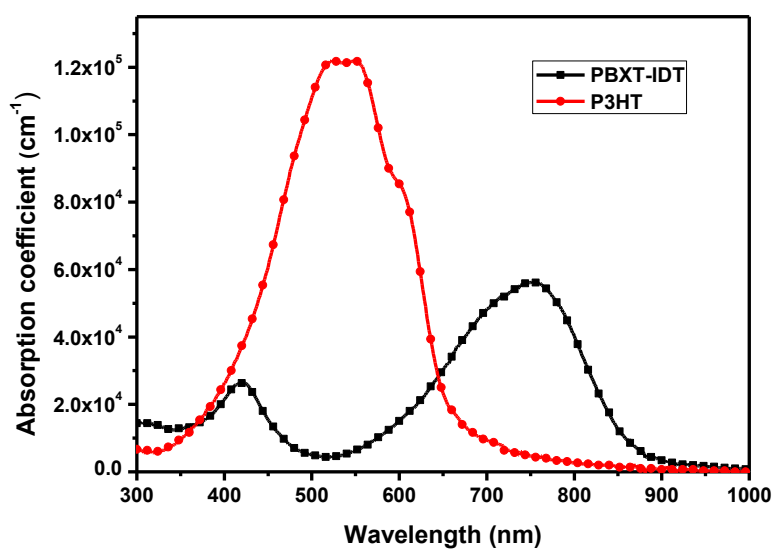

**Figure S3.** The absorption spectra of PBXT-IDT and P3HT in thin films

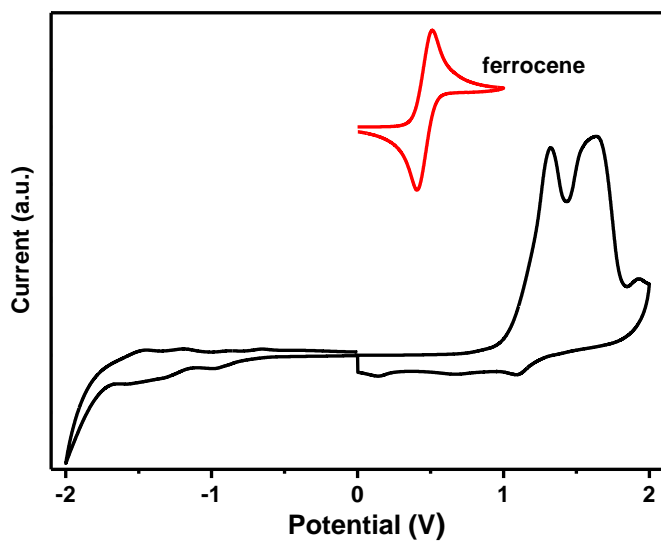

**Figure S4.** The CV curve of PBXT-IDT

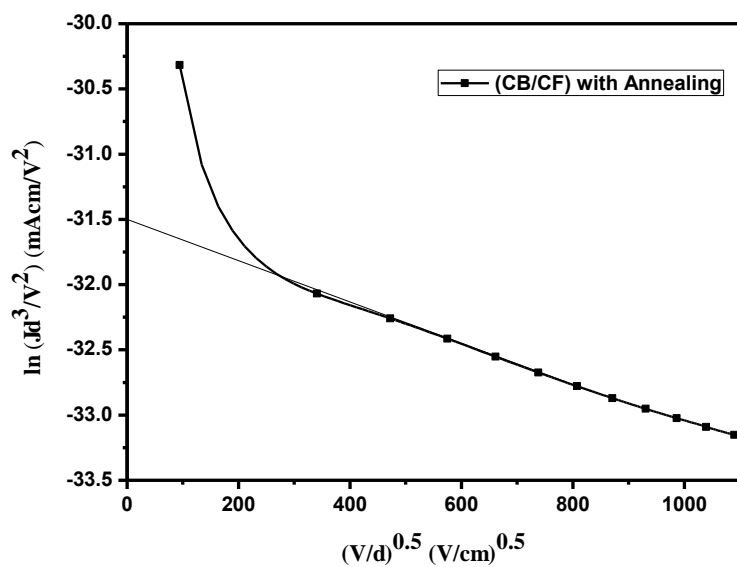

**Figure S5.**  $\ln(JL^3/V^2)$  vs  $(V/L)^{0.5}$  of plot of the all-PSCs based on P3HT / PBXT-IDT for the hole mobility measurement.

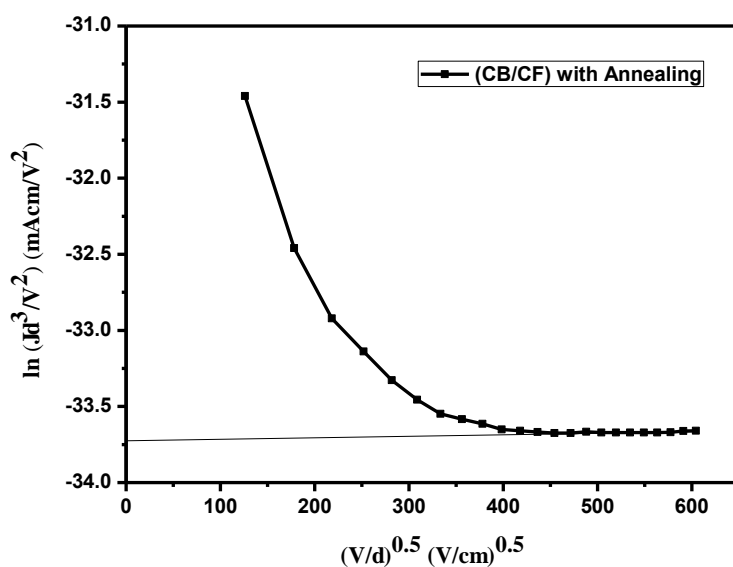

**Figure S6.**  $\ln(JL^3/V^2)$  vs  $(V/L)^{0.5}$  of plot of the all-PSCs based on P3HT / PBXT-IDT for the electron mobility measurement.

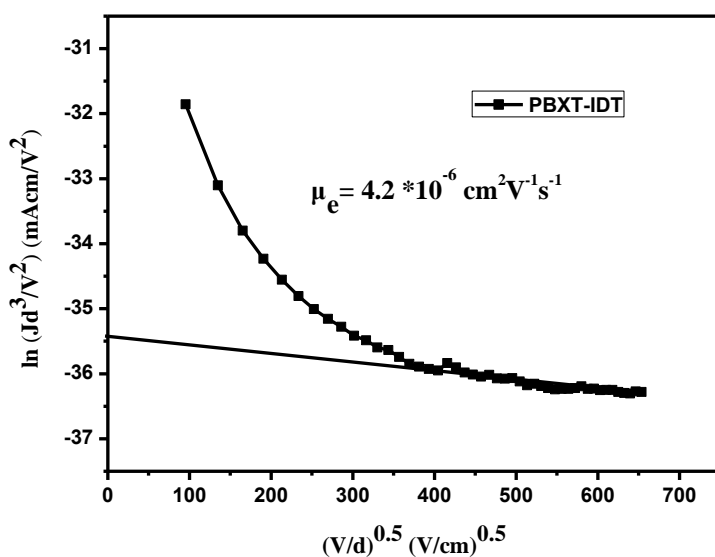

**Figure S7.**  $\ln(JL^3/V^2)$  vs  $(V/L)^{0.5}$  of plot of the pure PBXT-IDT film for the electron mobility measurement.

**Table S1.** OPV performances based on PBXT-IDT and P3HT with different p/n ratio.

| Polymer  | p/n | $V_{oc}$<br>(V) | $J_{sc}$<br>( mA cm <sup>-2</sup> ) | FF<br>(%) | PCE<br>(%) |
|----------|-----|-----------------|-------------------------------------|-----------|------------|
| PBXT-IDT | 1:1 | 0.83            | 1.15                                | 33.59     | 0.32       |
| PBXT-IDT | 2:1 | 0.86            | 1.07                                | 45.09     | 0.42       |
| PBXT-IDT | 3:1 | 0.88            | 1.18                                | 44.29     | 0.46       |
| PBXT-IDT | 4:1 | 0.88            | 1.41                                | 43.81     | 0.54       |
| PBXT-IDT | 5:1 | 0.83            | 1.19                                | 37.01     | 0.36       |

**Table S2.** OPV performances based on P3HT/PBXT-IDT (4:1, w/w) at different thermal annealing temperature.

| Polymer  | Annealing<br>(°C) | $V_{oc}$<br>(V) | $J_{sc}$<br>( mA cm <sup>-2</sup> ) | FF<br>(%) | PCE<br>(%) |
|----------|-------------------|-----------------|-------------------------------------|-----------|------------|
| PBXT-IDT | 90                | 0.83            | 2.27                                | 40.22     | 0.76       |
| PBXT-IDT | 100               | 0.79            | 2.24                                | 47.75     | 0.85       |
| PBXT-IDT | 110               | 0.76            | 2.15                                | 41.30     | 0.68       |

**Table S3.** OPV performances based on P3HT/PBXT-IDT (4:1, w/w) with different volume of chloroform with thermal annealing at 100 °C.

| Polymer  | Chloroform<br>(%) | $V_{oc}$<br>(V) | $J_{sc}$<br>( mA cm <sup>-2</sup> ) | FF<br>(%) | PCE<br>(%) |
|----------|-------------------|-----------------|-------------------------------------|-----------|------------|
| PBXT-IDT | 5                 | 0.82            | 2.41                                | 44.27     | 0.87       |
| PBXT-IDT | 10                | 0.84            | 2.95                                | 43.86     | 1.09       |
| PBXT-IDT | 20                | 0.83            | 2.26                                | 47.74     | 0.90       |

### $^1\text{H}$ NMR and $^{13}\text{C}$ NMR spectra of compound 3

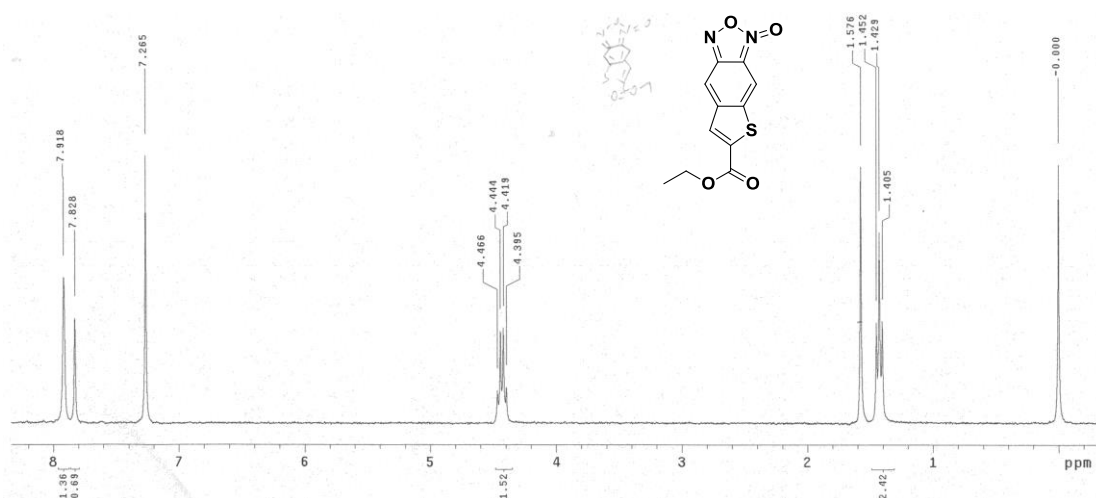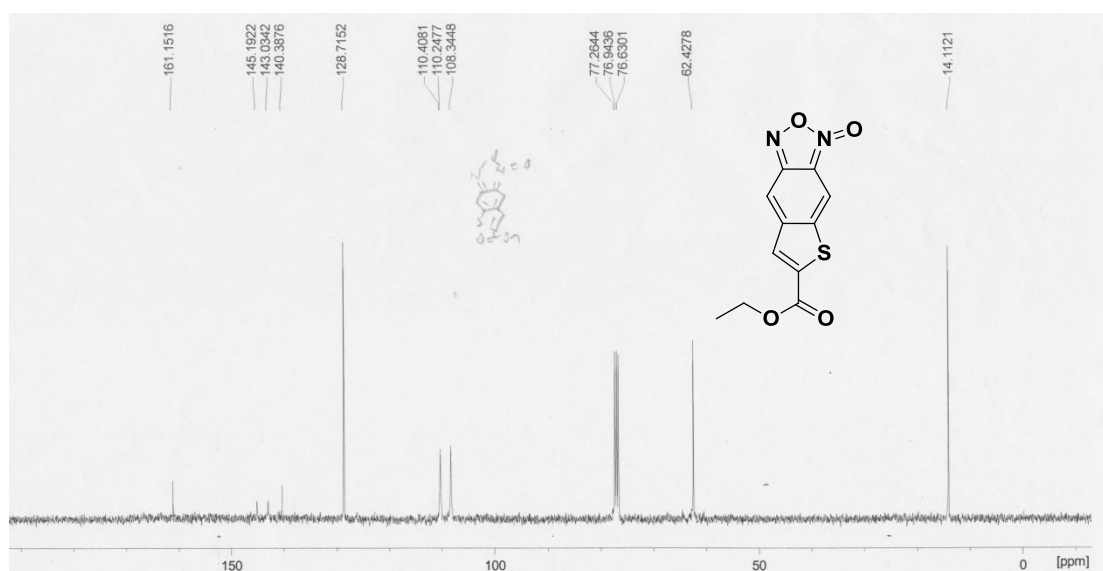

### $^1\text{H}$ NMR and $^{13}\text{C}$ NMR spectra of BXT

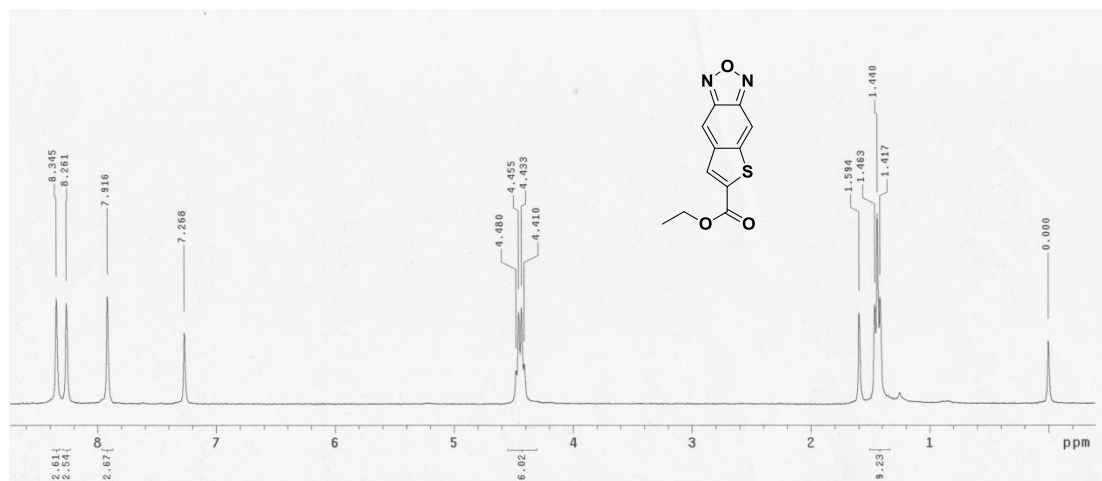

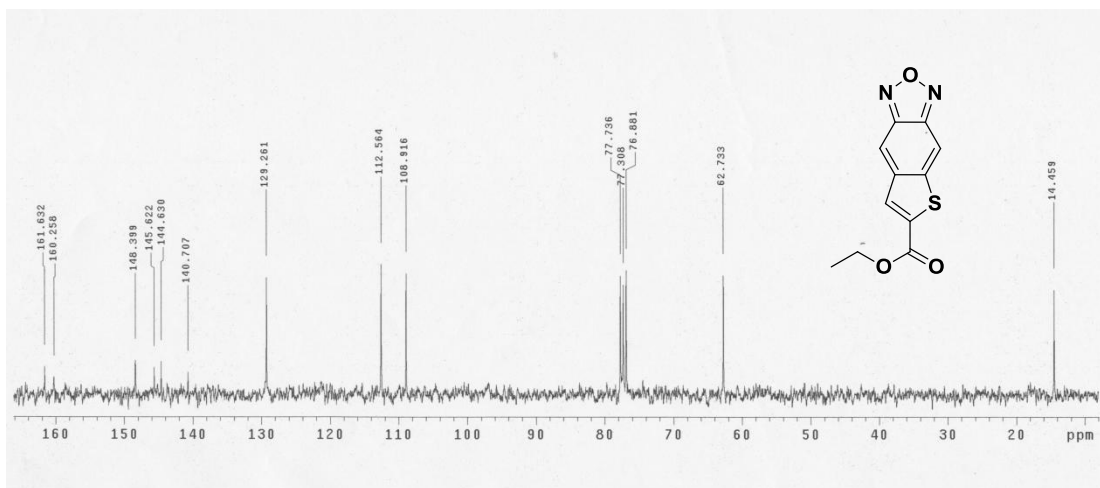

**<sup>1</sup>H NMR and <sup>13</sup>C NMR spectra of di-Br-BXT**

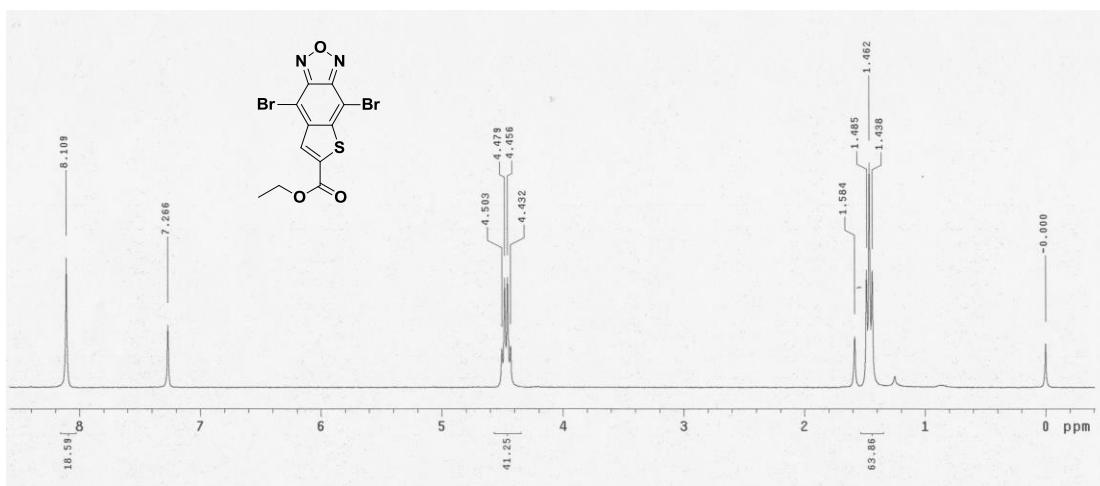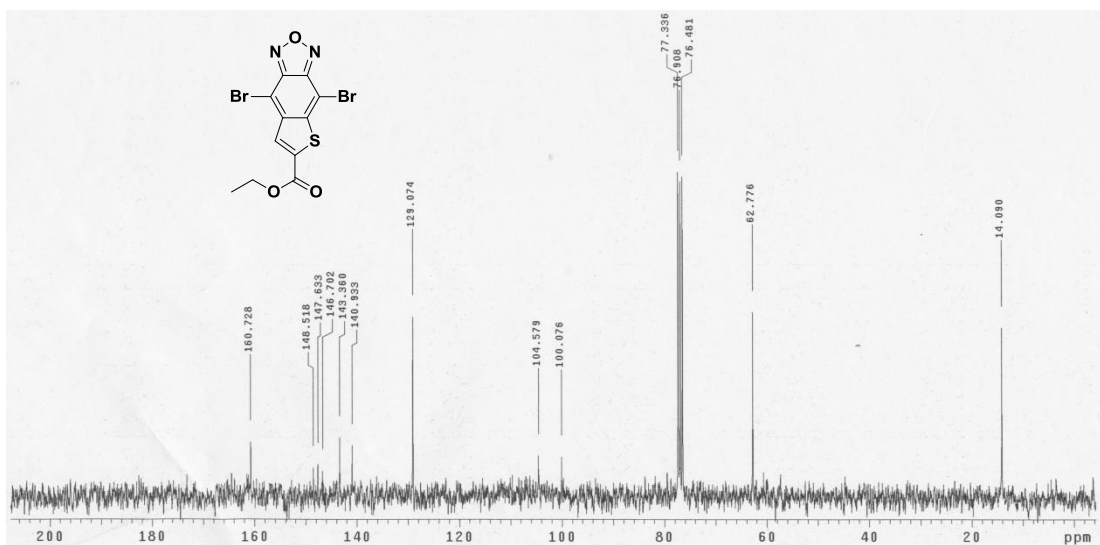



# $^1\text{H}$ NMR and $^{13}\text{C}$ NMR spectra of polymer PBXT-IDT

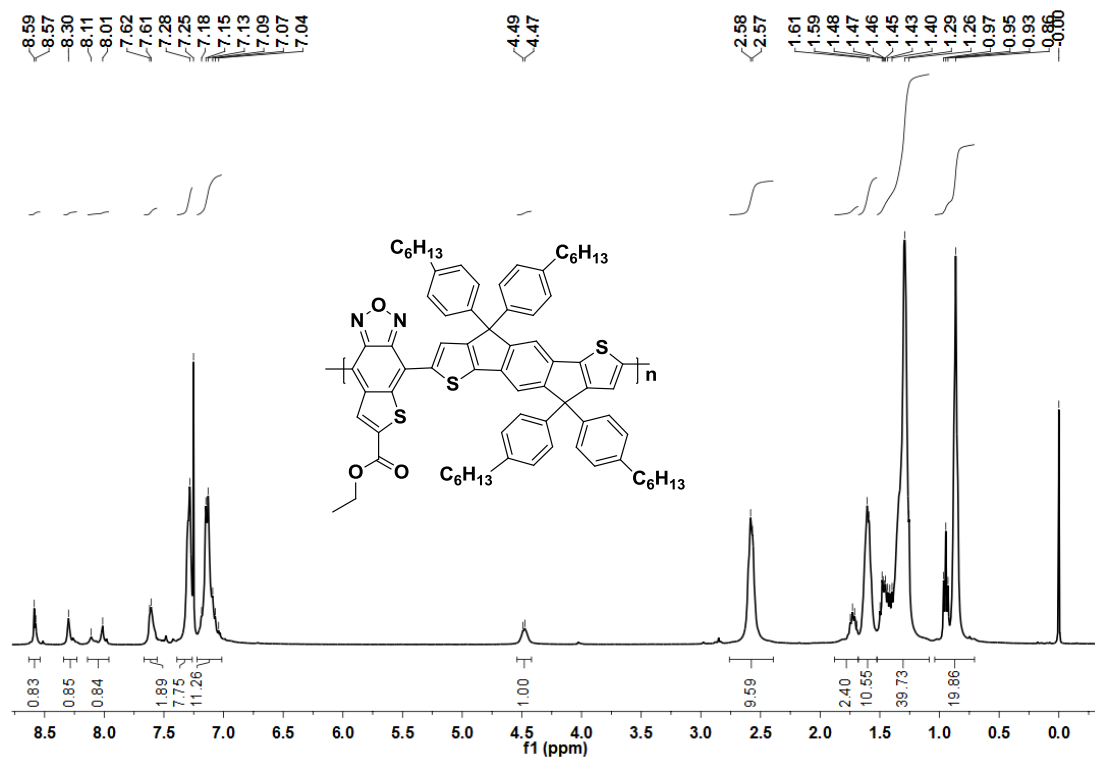

Supplement: c7ra02705b1.pdf [file c7ra02705b1.pdf]
